# Supplementary material
Source: PubMed Central journal article supplement (PMC8221262)
Supplement: MD-012-D1MD00041A-s001.pdf [file MD-012-D1MD00041A-s001.pdf]

## Supplementary data

### Tables with bias factors

| MOR ligand      | Biased pathway    | Bias factor ( $\beta$ ) | $10^{\beta}$ (equation 2) | Reference ligand | Calculation of bias          | Assay <sup>a</sup>                                                | Reference                              |
|-----------------|-------------------|-------------------------|---------------------------|------------------|------------------------------|-------------------------------------------------------------------|----------------------------------------|
| <b>TRV-130</b>  | G protein         | 3.00                    | /                         | Morphine         | $RA_1$                       | cAMP vs $\beta$ -arrestin-2                                       | DeWire, J. Pharmacol. Exp. Ther., 2013 |
|                 | G protein         | 1.64                    | 43.65                     | Morphine         | $\Delta\Delta\log(\tau/K_A)$ | cAMP vs $\beta$ -arrestin-2                                       | Burgueno, Sci. Rep., 2017              |
| Morphine        | $\beta$ -arrestin | -0.99                   | 0.10                      | <b>DAMGO</b>     | $\Delta\Delta\log(\tau/K_A)$ | GTP $\gamma$ S vs $\beta$ -arrestin-2                             | Thompson, Mol. Pharmacol., 2015        |
|                 | $\beta$ -arrestin | -0.13                   | 0.75                      | <b>DAMGO</b>     | $\Delta\Delta\log(\tau/K_A)$ | cAMP vs $\beta$ -arrestin-2                                       | Thompson, Mol. Pharmacol., 2015        |
|                 | G protein         | 0.11                    | 1.3                       | <b>DAMGO</b>     | $\Delta\Delta\log(\tau/K_A)$ | GTP $\gamma$ S vs $\beta$ -arrestin-2 (CHO cells)                 | Schmid, Cell, 2017                     |
|                 | $\beta$ -arrestin | -0.21                   | 0.62                      | <b>DAMGO</b>     | $\Delta\Delta\log(\tau/K_A)$ | cAMP vs $\beta$ -arrestin-2 (CHO cells)                           | Schmid, Cell, 2017                     |
|                 | $\beta$ -arrestin | -0.09                   | 0.80                      | <b>DAMGO</b>     | $\Delta\Delta\log(\tau/K_A)$ | GTP $\gamma$ S (mMOR) vs $\beta$ -arrestin-2 (mMOR) (CHO cells)   | Schmid, Cell, 2017                     |
|                 | G protein         | 0.29                    | 1.9                       | <b>DAMGO</b>     | $\Delta\Delta\log(\tau/K_A)$ | GTP $\gamma$ S (mMOR) vs $\beta$ -arrestin-2 (mMOR) (brain cells) | Schmid, Cell, 2017                     |
| Buprenorphine   | G protein         | 1.84                    | 69.2                      | Morphine         | $\Delta\Delta\log(\tau/K_A)$ | cAMP vs $\beta$ -arrestin-2                                       | Burgueno, Sci. Rep., 2017              |
| Kurkinorin      | G protein         | 0.57                    | /                         | <b>DAMGO</b>     | $\Delta\Delta\log(RA)$       | $\beta$ -arrestin-2 vs cAMP                                       | Crowley, J. Med. Chem., 2016           |
| Herkamide       | G protein         | 0.32                    | /                         | <b>DAMGO</b>     | $\Delta\Delta\log(RA)$       | $\beta$ -arrestin-2 vs cAMP                                       | Crowley, J. Med. Chem., 2016           |
| <b>SR-11501</b> | $\beta$ -arrestin | -0.39                   | 0.41                      | <b>DAMGO</b>     | $\Delta\Delta\log(\tau/K_A)$ | GTP $\gamma$ S vs $\beta$ -arrestin-2 (CHO cells)                 | Schmid, Cell, 2017                     |
|                 | $\beta$ -arrestin | -0.09                   | 0.81                      | <b>DAMGO</b>     | $\Delta\Delta\log(\tau/K_A)$ | cAMP vs $\beta$ -arrestin-2 (CHO cells)                           | Schmid, Cell, 2017                     |
|                 | $\beta$ -arrestin | -0.91                   | 0.12                      | <b>DAMGO</b>     | $\Delta\Delta\log(\tau/K_A)$ | GTP $\gamma$ S (mMOR) vs $\beta$ -arrestin-2 (mMOR) (CHO cells)   | Schmid, Cell, 2017                     |
|                 | $\beta$ -arrestin | -0.64                   | 0.23                      | <b>DAMGO</b>     | $\Delta\Delta\log(\tau/K_A)$ | GTP $\gamma$ S (mMOR) vs $\beta$ -arrestin-2 (mMOR) (brain cells) | Schmid, Cell, 2017                     |
| <b>SR-14968</b> | G protein         | 1.55                    | 36                        | <b>DAMGO</b>     | $\Delta\Delta\log(\tau/K_A)$ | GTP $\gamma$ S vs $\beta$ -arrestin-2 (CHO cells)                 | Schmid, Cell, 2017                     |
|                 | G protein         | 0.71                    | 5.1                       | <b>DAMGO</b>     | $\Delta\Delta\log(\tau/K_A)$ | cAMP vs $\beta$ -arrestin-2 (CHO cells)                           | Schmid, Cell, 2017                     |
|                 | G protein         | 0.83                    | 6.7                       | <b>DAMGO</b>     | $\Delta\Delta\log(\tau/K_A)$ | GTP $\gamma$ S (mMOR) vs $\beta$ -arrestin-2 (mMOR) (CHO cells)   | Schmid, Cell, 2017                     |

<sup>a</sup> All assays are performed on human receptor, expect if stated otherwise

|                 |                   |        |      |              |                              |                                                          |                                 |
|-----------------|-------------------|--------|------|--------------|------------------------------|----------------------------------------------------------|---------------------------------|
|                 | G protein         | 1.54   | 34   | <b>DAMGO</b> | $\Delta\Delta\log(\tau/K_A)$ | GTPyS (mMOR) vs $\beta$ -arrestin-2 (mMOR) (brain cells) | Schmid, Cell, 2017              |
| <b>SR-14969</b> | G protein         | 1.03   | 11   | <b>DAMGO</b> | $\Delta\Delta\log(\tau/K_A)$ | GTPyS vs $\beta$ -arrestin-2 (CHO cells)                 | Schmid, Cell, 2017              |
|                 | G protein         | 0.40   | 2.5  | <b>DAMGO</b> | $\Delta\Delta\log(\tau/K_A)$ | cAMP vs $\beta$ -arrestin-2 (CHO cells)                  | Schmid, Cell, 2017              |
|                 | G protein         | 0.46   | 2.9  | <b>DAMGO</b> | $\Delta\Delta\log(\tau/K_A)$ | GTPyS (mMOR) vs $\beta$ -arrestin-2 (mMOR) (CHO cells)   | Schmid, Cell, 2017              |
|                 | G protein         | 0.93   | 8.6  | <b>DAMGO</b> | $\Delta\Delta\log(\tau/K_A)$ | GTPyS (mMOR) vs $\beta$ -arrestin-2 (mMOR) (brain cells) | Schmid, Cell, 2017              |
| <b>SR-15098</b> | G protein         | 1.47   | 29   | <b>DAMGO</b> | $\Delta\Delta\log(\tau/K_A)$ | GTPyS vs $\beta$ -arrestin-2 (CHO cells)                 | Schmid, Cell, 2017              |
|                 | G protein         | 1.28   | 19   | <b>DAMGO</b> | $\Delta\Delta\log(\tau/K_A)$ | cAMP vs $\beta$ -arrestin-2 (CHO cells)                  | Schmid, Cell, 2017              |
|                 | G protein         | 1.03   | 11   | <b>DAMGO</b> | $\Delta\Delta\log(\tau/K_A)$ | GTPyS (mMOR) vs $\beta$ -arrestin-2 (mMOR) (CHO cells)   | Schmid, Cell, 2017              |
|                 | G protein         | 1.74   | 55   | <b>DAMGO</b> | $\Delta\Delta\log(\tau/K_A)$ | GTPyS (mMOR) vs $\beta$ -arrestin-2 (mMOR) (brain cells) | Schmid, Cell, 2017              |
| <b>SR-15099</b> | G protein         | 1.68   | 47   | <b>DAMGO</b> | $\Delta\Delta\log(\tau/K_A)$ | GTPyS vs $\beta$ -arrestin-2 (CHO cells)                 | Schmid, Cell, 2017              |
|                 | G protein         | 1.44   | 27   | <b>DAMGO</b> | $\Delta\Delta\log(\tau/K_A)$ | cAMP vs $\beta$ -arrestin-2 (CHO cells)                  | Schmid, Cell, 2017              |
|                 | G protein         | 1.07   | 12   | <b>DAMGO</b> | $\Delta\Delta\log(\tau/K_A)$ | GTPyS (mMOR) vs $\beta$ -arrestin-2 (mMOR) (CHO cells)   | Schmid, Cell, 2017              |
|                 | G protein         | 1.74   | 55   | <b>DAMGO</b> | $\Delta\Delta\log(\tau/K_A)$ | GTPyS (mMOR) vs $\beta$ -arrestin-2 (mMOR) (brain cells) | Schmid, Cell, 2017              |
| <b>SR-17018</b> | G protein         | 1.93   | 85   | <b>DAMGO</b> | $\Delta\Delta\log(\tau/K_A)$ | GTPyS vs $\beta$ -arrestin-2 (CHO cells)                 | Schmid, Cell, 2017              |
|                 | G protein         | 1.60   | 40   | <b>DAMGO</b> | $\Delta\Delta\log(\tau/K_A)$ | cAMP vs $\beta$ -arrestin-2 (CHO cells)                  | Schmid, Cell, 2017              |
|                 | G protein         | 1.47   | 30   | <b>DAMGO</b> | $\Delta\Delta\log(\tau/K_A)$ | GTPyS (mMOR) vs $\beta$ -arrestin-2 (mMOR) (CHO cells)   | Schmid, Cell, 2017              |
|                 | G protein         | 2.01   | 102  | <b>DAMGO</b> | $\Delta\Delta\log(\tau/K_A)$ | GTPyS (mMOR) vs $\beta$ -arrestin-2 (mMOR) (brain cells) | Schmid, Cell, 2017              |
| <b>41</b>       | G protein         | 1.36   | 23   | <b>DAMGO</b> | $\Delta\Delta\log(\tau/K_A)$ | GTPyS vs $\beta$ -arrestin-2                             | Kennedy, J. Med. Chem., 2018    |
| <b>44</b>       | G protein         | 1.75   | 56   | <b>DAMGO</b> | $\Delta\Delta\log(\tau/K_A)$ | GTPyS vs $\beta$ -arrestin-2                             | Kennedy, J. Med. Chem., 2018    |
| Endomorphin-1   | $\beta$ -arrestin | -1.224 | 0.06 | <b>DAMGO</b> | $\Delta\Delta\log(\tau/K_A)$ | GTPyS vs $\beta$ -arrestin-2                             | Thompson, Mol. Pharmacol., 2015 |
|                 | G protein         | 0.614  | 4.11 | <b>DAMGO</b> | $\Delta\Delta\log(\tau/K_A)$ | cAMP vs $\beta$ -arrestin-2                              | Thompson, Mol. Pharmacol., 2015 |
|                 | $\beta$ -arrestin | -0.286 | 0.52 | <b>DAMGO</b> | $\Delta\Delta\log(\tau/K_A)$ | GTPyS vs $\beta$ -arrestin-1                             | Thompson, Mol. Pharmacol., 2015 |
|                 | G protein         | 1.552  | 35.6 | <b>DAMGO</b> | $\Delta\Delta\log(\tau/K_A)$ | cAMP vs $\beta$ -arrestin-1                              | Thompson, Mol. Pharmacol., 2015 |
| Endomorphin-2   | $\beta$ -arrestin | -0.56  | 0.27 | <b>DAMGO</b> | $\Delta\Delta\log(\tau/K_A)$ | GTPyS vs $\beta$ -arrestin-2                             | Thompson, Mol. Pharmacol., 2015 |
|                 | G protein         | 0.59   | 3.93 | <b>DAMGO</b> | $\Delta\Delta\log(\tau/K_A)$ | cAMP vs $\beta$ -arrestin-2                              | Thompson, Mol. Pharmacol., 2015 |
|                 | $\beta$ -arrestin | -0.82  | 0.15 | <b>DAMGO</b> | $\Delta\Delta\log(\tau/K_A)$ | GTPyS vs $\beta$ -arrestin-1                             | Thompson, Mol. Pharmacol., 2015 |

|            |                   |       |      |              |                              |                                                          |                                 |
|------------|-------------------|-------|------|--------------|------------------------------|----------------------------------------------------------|---------------------------------|
|            | G protein         | 0.33  | 2.15 | <b>DAMGO</b> | $\Delta\Delta\log(\tau/K_A)$ | cAMP vs $\beta$ -arrestin-1                              | Thompson, Mol. Pharmacol., 2015 |
| Fentanyl   | $\beta$ -arrestin | -0.7  | 0.18 | <b>DAMGO</b> | $\Delta\Delta\log(\tau/K_A)$ | GTPyS vs $\beta$ -arrestin-2 (CHO cells)                 | Schmid, Cell, 2017              |
|            | G protein         | 0.45  | 2.8  | <b>DAMGO</b> | $\Delta\Delta\log(\tau/K_A)$ | cAMP vs $\beta$ -arrestin-2 (CHO cells)                  | Schmid, Cell, 2017              |
|            | $\beta$ -arrestin | -1.27 | 0.05 | <b>DAMGO</b> | $\Delta\Delta\log(\tau/K_A)$ | GTPyS (mMOR) vs $\beta$ -arrestin-2 (mMOR) (CHO cells)   | Schmid, Cell, 2017              |
|            | $\beta$ -arrestin | -0.83 | 0.15 | <b>DAMGO</b> | $\Delta\Delta\log(\tau/K_A)$ | GTPyS (mMOR) vs $\beta$ -arrestin-2 (mMOR) (brain cells) | Schmid, Cell, 2017              |
|            | G protein         | 0.96  | 9.1  | <b>DAMGO</b> | $\Delta\Delta\log(\tau/K_A)$ | cAMP vs $\beta$ -arrestin-2                              | Burgueno, Sci. Rep., 2017       |
| Sufentanil | $\beta$ -arrestin | -0.78 | 0.16 | <b>DAMGO</b> | $\Delta\Delta\log(\tau/K_A)$ | GTPyS vs $\beta$ -arrestin-2 (CHO cells)                 | Schmid, Cell, 2017              |
|            | G protein         | 0.02  | 1.1  | <b>DAMGO</b> | $\Delta\Delta\log(\tau/K_A)$ | cAMP vs $\beta$ -arrestin-2 (CHO cells)                  | Schmid, Cell, 2017              |
|            | $\beta$ -arrestin | -1.25 | 0.06 | <b>DAMGO</b> | $\Delta\Delta\log(\tau/K_A)$ | GTPyS (mMOR) vs $\beta$ -arrestin-2 (mMOR) (CHO cells)   | Schmid, Cell, 2017              |
|            | $\beta$ -arrestin | -0.85 | 0.14 | <b>DAMGO</b> | $\Delta\Delta\log(\tau/K_A)$ | GTPyS (mMOR) vs $\beta$ -arrestin-2 (mMOR) (brain cells) | Schmid, Cell, 2017              |

| DOR ligand        | Biased pathway    | Bias factor ( $\beta$ ) | $10^{\beta}$ (equation 2) | Reference ligand | Calculation of bias          | Assay                                      | Reference                                |
|-------------------|-------------------|-------------------------|---------------------------|------------------|------------------------------|--------------------------------------------|------------------------------------------|
| Rubiscolin-5      | G protein         | 0.31                    | 2.04                      | Leu-ENK          | $\Delta\Delta\log(\tau/K_A)$ | cAMP vs $\beta$ -arrestin-2                | Cassell, Eur. Neuropharmacol., 2019      |
| Rubiscolin-6      | $\beta$ -arrestin | -0.28                   | 0.52                      | Leu-ENK          | $\Delta\Delta\log(\tau/K_A)$ | cAMP vs $\beta$ -arrestin-2                | Cassell, Eur. Neuropharmacol., 2019      |
| <b>DADLE</b>      | G protein         | 1.5                     | 31.6                      | <b>SNC-80</b>    | $\Delta\Delta\log(\tau/K_A)$ | $G_{\alpha i}$ BRET vs $\beta$ -arrestin-1 | Conibear, J. Pharmacol. Exp. Ther., 2020 |
|                   | G protein         | 1.15                    | 14.1                      | <b>SNC-80</b>    | $\Delta\Delta\log(\tau/K_A)$ | $G_{\alpha i}$ BRET vs $\beta$ -arrestin-2 | Conibear, J. Pharmacol. Exp. Ther., 2020 |
| <b>UFP-512</b>    | G protein         | 2.12                    | 132                       | <b>DPDPE</b>     | $\Delta\Delta\log(\tau/K_A)$ | cAMP vs internalization                    | Charfi, Cell. Mol. Life Sci., 2014       |
| <b>SNC-80</b>     | G protein         | 1.70                    | 50                        | <b>DPDPE</b>     | $\Delta\Delta\log(\tau/K_A)$ | cAMP vs internalization                    | Charfi, Cell. Mol. Life Sci., 2014       |
| <b>PN6047</b>     | G protein         | 1.17                    | 14.8                      | <b>SNC-80</b>    | $\Delta\Delta\log(\tau/K_A)$ | $G_{\alpha i}$ BRET vs $\beta$ -arrestin-1 | Conibear, J. Pharmacol. Exp. Ther., 2020 |
|                   | G protein         | 0.885                   | 7.5                       | <b>SNC-80</b>    | $\Delta\Delta\log(\tau/K_A)$ | $G_{\alpha i}$ BRET vs $\beta$ -arrestin-2 | Conibear, J. Pharmacol. Exp. Ther., 2020 |
| <b>ARM390</b>     | G protein         | 0.55                    | 3.9                       | <b>SNC-80</b>    | $\Delta\Delta\log(\tau/K_A)$ | $G_{\alpha i}$ BRET vs $\beta$ -arrestin-2 | Conibear, J. Pharmacol. Exp. Ther., 2020 |
| <b>TAN-67</b>     | G protein         | -1.4                    | /                         | Leu-ENK          | $\Delta\Delta\log(RA)$       | $\beta$ -arrestin-2 vs cAMP                | Robins, Front. Psychiatry, 2018          |
| <b>BMS-986187</b> | G protein         | 1.53                    | 34                        | <b>SNC-80</b>    | $\Delta\Delta\log(\tau/K_A)$ | GTPyS vs $\beta$ -arrestin-2               | Stanczyk, Br. J. Pharmacol., 2019        |

| KOR ligand         | Biased pathway    | Bias factor ( $\beta$ ) | $10^{\beta}$ (equation 2) | Reference ligand | Calculation of bias           | Assay                                                          | Reference                           |
|--------------------|-------------------|-------------------------|---------------------------|------------------|-------------------------------|----------------------------------------------------------------|-------------------------------------|
| Triazole 1.1       | G protein         | 1.79                    | 61.2                      | <b>U69.593</b>   | $\Delta\Delta\log(\tau/K_A)$  | GTPyS vs $\beta$ -arrestin-2 (enzyme fragment complementation) | Zhou, J. Biol. Chem., 2013          |
|                    | G protein         | 1.3                     | 20                        | <b>U69.593</b>   | $\Delta\Delta\log(\tau/K_A)$  | GTPyS vs $\beta$ -arrestin-2 (imaging)                         | Zhou, J. Biol. Chem., 2013          |
| Triazole 1.5       | G protein         | 2.05                    | 111.7                     | <b>U69.593</b>   | $\Delta\Delta\log(\tau/K_A)$  | GTPyS vs $\beta$ -arrestin-2 (EFC)                             | Zhou, J. Biol. Chem., 2013          |
|                    | G protein         | 2.00                    | 100                       | <b>U69.593</b>   | $\Delta\Delta\log(\tau/K_A)$  | GTPyS vs $\beta$ -arrestin-2 (imaging)                         | Zhou, J. Biol. Chem., 2013          |
| <b>1.2</b>         | G protein         | 1.9                     | 122                       | <b>U69.593</b>   | $\Delta\Delta\log(\tau/K_A)$  | GTPyS vs $\beta$ -arrestin-2                                   | Lovell, ACS Chem. Neurosci., 2015   |
| <b>6'-GNTI</b>     | G protein         | 0.76                    | 6                         | Salvinorin A     | $\Delta\Delta\log(\tau/K_A)$  | cAMP vs $\beta$ -arrestin-2                                    | White, Mol. Pharmacol., 2014        |
| <b>RB-64</b>       | G protein         | 1.55                    | 35                        | Salvinorin A     | $\Delta\Delta\log(\tau/K_A)$  | cAMP vs $\beta$ -arrestin-2                                    | White, Mol. Pharmacol., 2014        |
|                    | G protein         | 1.98                    | 96                        | Salvinorin A     | $\Delta\Delta\log(\tau/K_A)$  | cAMP (mKOR) vs $\beta$ -arrestin (mKOR)                        | White, J. Pharmacol., 2015          |
| Nalfurafine        | G protein         | 1.15                    | /                         | <b>U50,488</b>   | $\Delta\Delta\log(\text{RA})$ | ERK1/2 phosphorylation (rkOR) vs p38 phosphorylation (rkOR)    | Schattauer, Cell. Signal., 2017     |
|                    | G protein         | 3.2                     | /                         | <b>U50,488</b>   | $\Delta\Delta\log(\text{RA})$ | ERK1/2 phosphorylation vs p38 phosphorylation                  | Schattauer, Cell. Signal., 2017     |
| Mesyl Sal B        | G protein         | 0.61                    | /                         | <b>U50,488</b>   | $\Delta\Delta\log(\text{RA})$ | cAMP vs $\beta$ -arrestin-2                                    | Kivell, Molecules, 2018             |
| <b>GR89696</b>     | $\beta$ -arrestin | 0.67                    | 5                         | Salvinorin A     | $\Delta\Delta\log(\tau/K_A)$  | $\beta$ -arrestin-2 vs cAMP                                    | White, Mol. Pharmacol., 2014        |
| <b>U50.488</b>     | G protein         | 0.91                    | 8                         | Salvinorin A     | $\Delta\Delta\log(\tau/K_A)$  | cAMP vs $\beta$ -arrestin-2                                    | White, Mol. Pharmacol., 2014        |
|                    | G protein         | 0.6                     | /                         | <b>U69.593</b>   | $\Delta\log(\text{RA})$       | GTPyS vs $\beta$ -arrestin-2                                   | Dunn, Int. J. Neuropharmacol., 2018 |
| <b>(-) U50.488</b> | $\beta$ -arrestin | 0.31                    | 2                         | Salvinorin A     | $\Delta\Delta\log(\tau/K_A)$  | $\beta$ -arrestin-2 vs cAMP                                    | White, Mol. Pharmacol., 2014        |
| <b>BPHA</b>        | G protein         | 1.8                     | /                         | <b>U69.593</b>   | $\Delta\log(\text{RA})$       | GTPyS vs $\beta$ -arrestin-2                                   | Dunn, Int. J. Neuropharmacol., 2018 |
| <b>MCBPHA</b>      | G protein         | 1.6                     | /                         | <b>U69.593</b>   | $\Delta\log(\text{RA})$       | GTPyS vs $\beta$ -arrestin-2                                   | Dunn, Int. J. Neuropharmacol., 2018 |
| <b>MCPPHA</b>      | G protein         | 1.3                     | /                         | <b>U69.593</b>   | $\Delta\log(\text{RA})$       | GTPyS vs $\beta$ -arrestin-2                                   | Dunn, Int. J. Neuropharmacol., 2018 |
| Dyn A              | G protein         | 1.56                    | 34                        | Salvinorin A     | $\Delta\Delta\log(\tau/K_A)$  | cAMP vs $\beta$ -arrestin-2                                    | White, Mol. Pharmacol., 2014        |
| Dyn 1-8            | G protein         | 0.68                    | 4                         | Salvinorin A     | $\Delta\Delta\log(\tau/K_A)$  | cAMP vs $\beta$ -arrestin-2                                    | White, Mol. Pharmacol., 2014        |
| Dyn 1-9            | G protein         | 1.22                    | 16                        | Salvinorin A     | $\Delta\Delta\log(\tau/K_A)$  | cAMP vs $\beta$ -arrestin-2                                    | White, Mol. Pharmacol., 2014        |
| Dyn 1-11           | G protein         | 1.67                    | 44                        | Salvinorin A     | $\Delta\Delta\log(\tau/K_A)$  | cAMP vs $\beta$ -arrestin-2                                    | White, Mol. Pharmacol., 2014        |
| Dyn 1-13           | G protein         | 1.56                    | 34                        | Salvinorin A     | $\Delta\Delta\log(\tau/K_A)$  | cAMP vs $\beta$ -arrestin-2                                    | White, Mol. Pharmacol., 2014        |
| Isoquinoline 2.1   | G protein         | 1.50                    | 31.4                      | <b>U69.593</b>   | $\Delta\Delta\log(\tau/K_A)$  | GTPyS vs $\beta$ -arrestin-2 (EFC)                             | Zhou, J. Biol. Chem., 2013          |

|                  |           |       |      |                |                              |                                        |                                 |
|------------------|-----------|-------|------|----------------|------------------------------|----------------------------------------|---------------------------------|
|                  | G protein | 0.86  | 7.2  | <b>U69.593</b> | $\Delta\Delta\log(\tau/K_A)$ | GTPyS vs $\beta$ -arrestin-2 (imaging) | Zhou, J. Biol. Chem., 2013      |
| Isoquinoline 2.2 | G protein | 1.67  | 46.7 | <b>U69.593</b> | $\Delta\Delta\log(\tau/K_A)$ | GTPyS vs $\beta$ -arrestin-2 (EFC)     | Zhou, J. Biol. Chem., 2013      |
|                  | G protein | 2.00  | 100  | <b>U69.593</b> | $\Delta\Delta\log(\tau/K_A)$ | GTPyS vs $\beta$ -arrestin-2 (imaging) | Zhou, J. Biol. Chem., 2013      |
| <b>LOR17</b>     | G protein | 2.931 | 853  | <b>U50,488</b> | $\Delta\Delta\log(\tau/K_A)$ | cAMP vs $\beta$ -arrestin-2            | Bedini, Front. Pharmacol., 2020 |
| Compound 81      | G protein | 0.78  | 6    | Salvinorin A   | $\Delta\Delta\log(\tau/K_A)$ | cAMP vs $\beta$ -arrestin-2            | Zheng, J. Med. Chem., 2017      |

| NOR ligand        | Biased pathway    | Bias factor ( $\beta$ ) | $10^{\beta}$ (equation 2) | Reference ligand | Calculation of bias          | Assay                                      | Reference                            |
|-------------------|-------------------|-------------------------|---------------------------|------------------|------------------------------|--------------------------------------------|--------------------------------------|
| <b>MCOPPB</b>     | G protein         | 1.52                    | 33.1                      | <b>N/OFQ</b>     | $\Delta\Delta\log(\tau/K_A)$ | cAMP vs $\beta$ -arrestin-1                | Chang, Mol. Pharmacol., 2015         |
|                   | G protein         | 1.55                    | 35.5                      | <b>N/OFQ</b>     | $\Delta\Delta\log(\tau/K_A)$ | cAMP vs $\beta$ -arrestin-2                | Chang, Mol. Pharmacol., 2015         |
|                   | G protein         | 0.97                    | 9.33                      | <b>N/OFQ</b>     | $\Delta\Delta\log(\tau/K_A)$ | G $_{\beta 1}$ BRET vs $\beta$ -arrestin-2 | Ferrari, Pharmacol. Res. Pers., 2017 |
| <b>SCH 221510</b> | G protein         | 0.77                    | /                         | <b>N/OFQ</b>     | $\Delta\log(RA)$             | G $_{\beta 1}$ BRET vs $\beta$ -arrestin-2 | Malfacini, PloS one, 2015            |
|                   | G protein         | 1.10                    | 12.59                     | <b>N/OFQ</b>     | $\Delta\Delta\log(\tau/K_A)$ | G $_{\beta 1}$ BRET vs $\beta$ -arrestin-2 | Ferrari, Pharmacol. Res. Pers., 2017 |
| <b>SCH 486757</b> | G protein         | 0.81                    | 6.46                      | <b>N/OFQ</b>     | $\Delta\Delta\log(\tau/K_A)$ | G $_{\beta 1}$ BRET vs $\beta$ -arrestin-2 | Ferrari, Pharmacol. Res. Pers., 2017 |
| <b>UFP-112</b>    | G protein         | 0.71                    | /                         | <b>N/OFQ</b>     | $\Delta\log(RA)$             | G $_{\beta 1}$ BRET vs $\beta$ -arrestin-2 | Malfacini, PloS one, 2015            |
| <b>PWT2-N/OFQ</b> | G protein         | 1.09                    | /                         | <b>N/OFQ</b>     | $\Delta\log(RA)$             | G $_{\beta 1}$ BRET vs $\beta$ -arrestin-2 | Malfacini, PloS one, 2015            |
| <b>Ro65-6570</b>  | G protein         | 1.07                    | /                         | <b>N/OFQ</b>     | $\Delta\log(RA)$             | G $_{\beta 1}$ BRET vs $\beta$ -arrestin-2 | Malfacini, PloS one, 2015            |
|                   | G protein         | 1.00                    | 10                        | <b>N/OFQ</b>     | $\Delta\Delta\log(\tau/K_A)$ | G $_{\beta 1}$ BRET vs $\beta$ -arrestin-2 | Ferrari, Eur. J. Pharmacol., 2016    |
|                   | G protein         | 1.64                    | 43.65                     | <b>N/OFQ</b>     | $\Delta\Delta\log(\tau/K_A)$ | G $_{\beta 1}$ BRET vs $\beta$ -arrestin-2 | Ferrari, Pharmacol. Res. Pers., 2017 |
| <b>Ro2q</b>       | G protein         | 0.93                    | 8.51                      | <b>N/OFQ</b>     | $\Delta\Delta\log(\tau/K_A)$ | G $_{\beta 1}$ BRET vs $\beta$ -arrestin-2 | Ferrari, Pharmacol. Res. Pers., 2017 |
| <b>AT-090</b>     | $\beta$ -arrestin | -0.78                   | 0.17                      | <b>N/OFQ</b>     | $\Delta\Delta\log(\tau/K_A)$ | G $_{\beta 1}$ BRET vs $\beta$ -arrestin-2 | Ferrari, Eur. J. Pharmacol., 2016    |
| <b>AT-127</b>     | G protein         | 0.27                    | 1.86                      | <b>N/OFQ</b>     | $\Delta\Delta\log(\tau/K_A)$ | G $_{\beta 1}$ BRET vs $\beta$ -arrestin-2 | Ferrari, Eur. J. Pharmacol., 2016    |
| <b>AT-202</b>     | G protein         | 0.46                    | 2.88                      | <b>N/OFQ</b>     | $\Delta\Delta\log(\tau/K_A)$ | G $_{\beta 1}$ BRET vs $\beta$ -arrestin-2 | Ferrari, Pharmacol. Res. Pers., 2017 |
| <b>AT-403</b>     | G protein         | 0.16                    | 1.45                      | <b>N/OFQ</b>     | $\Delta\Delta\log(\tau/K_A)$ | G $_{\beta 1}$ BRET vs $\beta$ -arrestin-2 | Ferrari, Pharmacol. Res. Pers., 2017 |

| Bifunctional ligand                  | Biased pathway    | Bias factor ( $\beta$ ) | $10^{\beta}$ (equation 2) | Reference ligand | Calculation of bias          | Assay (receptor)                                       | Reference                             |
|--------------------------------------|-------------------|-------------------------|---------------------------|------------------|------------------------------|--------------------------------------------------------|---------------------------------------|
| Dmt-c[D-Lys-Phe-Asp]-NH <sub>2</sub> | $\beta$ -arrestin | -1.16                   | 0.07                      | EM-2             | $\Delta\Delta\log(\tau/K_A)$ | G $_{\beta 1}$ BRET (MOR) vs $\beta$ -arrestin-2 (MOR) | Gach-Janczak, Peptides, 2018          |
| <b>2S-LP2</b>                        | G protein         | 0.82                    | 6.6                       | <b>DADLE</b>     | $\Delta\Delta\log(\tau/K_A)$ | G $_{\beta 1}$ BRET (MOR) vs $\beta$ -arrestin-2 (MOR) | Pasquinucci, Eur. J. Med. Chem., 2019 |
|                                      | G protein         | 2.31                    | 204.2                     | <b>DADLE</b>     | $\Delta\Delta\log(\tau/K_A)$ | G $_{\beta 1}$ BRET (DOR) vs $\beta$ -arrestin-2 (DOR) | Pasquinucci, Eur. J. Med. Chem., 2019 |
| <b>rac-LP2</b>                       | G protein         | 0.57                    | 3.7                       | <b>DADLE</b>     | $\Delta\Delta\log(\tau/K_A)$ | G $_{\beta 1}$ BRET (MOR) vs $\beta$ -arrestin-2 (MOR) | Pasquinucci, Eur. J. Med. Chem., 2019 |
|                                      | G protein         | 2.03                    | 107.2                     | <b>DADLE</b>     | $\Delta\Delta\log(\tau/K_A)$ | G $_{\beta 1}$ BRET (DOR) vs $\beta$ -arrestin-2 (DOR) | Pasquinucci, Eur. J. Med. Chem., 2019 |
